# Supplementary material for: Climate Response to Severe Forestation: A Regional Climate Model Intercomparison Study
Source: Copernicus journal article supplement (doi:10.5194/egusphere-2022-291), 2022-05-10
Supplement: Supplementary file 1 [file egusphere-2022-291-supplement.pdf]

# **Climate Response to Severe Forestation: A Regional Climate Model Intercomparison Study — Supplemental Material —**

Olivier Asselin<sup>1</sup>, Martin Leduc<sup>1</sup>, Dominique Paquin<sup>1</sup>, Katja Winger<sup>2</sup>, Alejandro Di Luca<sup>2</sup>,  
Melissa Bukovsky<sup>3</sup>, Biljana Music<sup>1</sup>, and Michel Giguère<sup>1</sup>

<sup>1</sup>Ouranos, Montréal, Québec, Canada

<sup>2</sup>Centre ESCER, Université du Québec à Montréal, Montréal, Québec, Canada

<sup>3</sup>National Center for Atmospheric Research, Boulder, Colorado

**Correspondence:** Olivier Asselin (asselin.olivier@ouranos.ca)

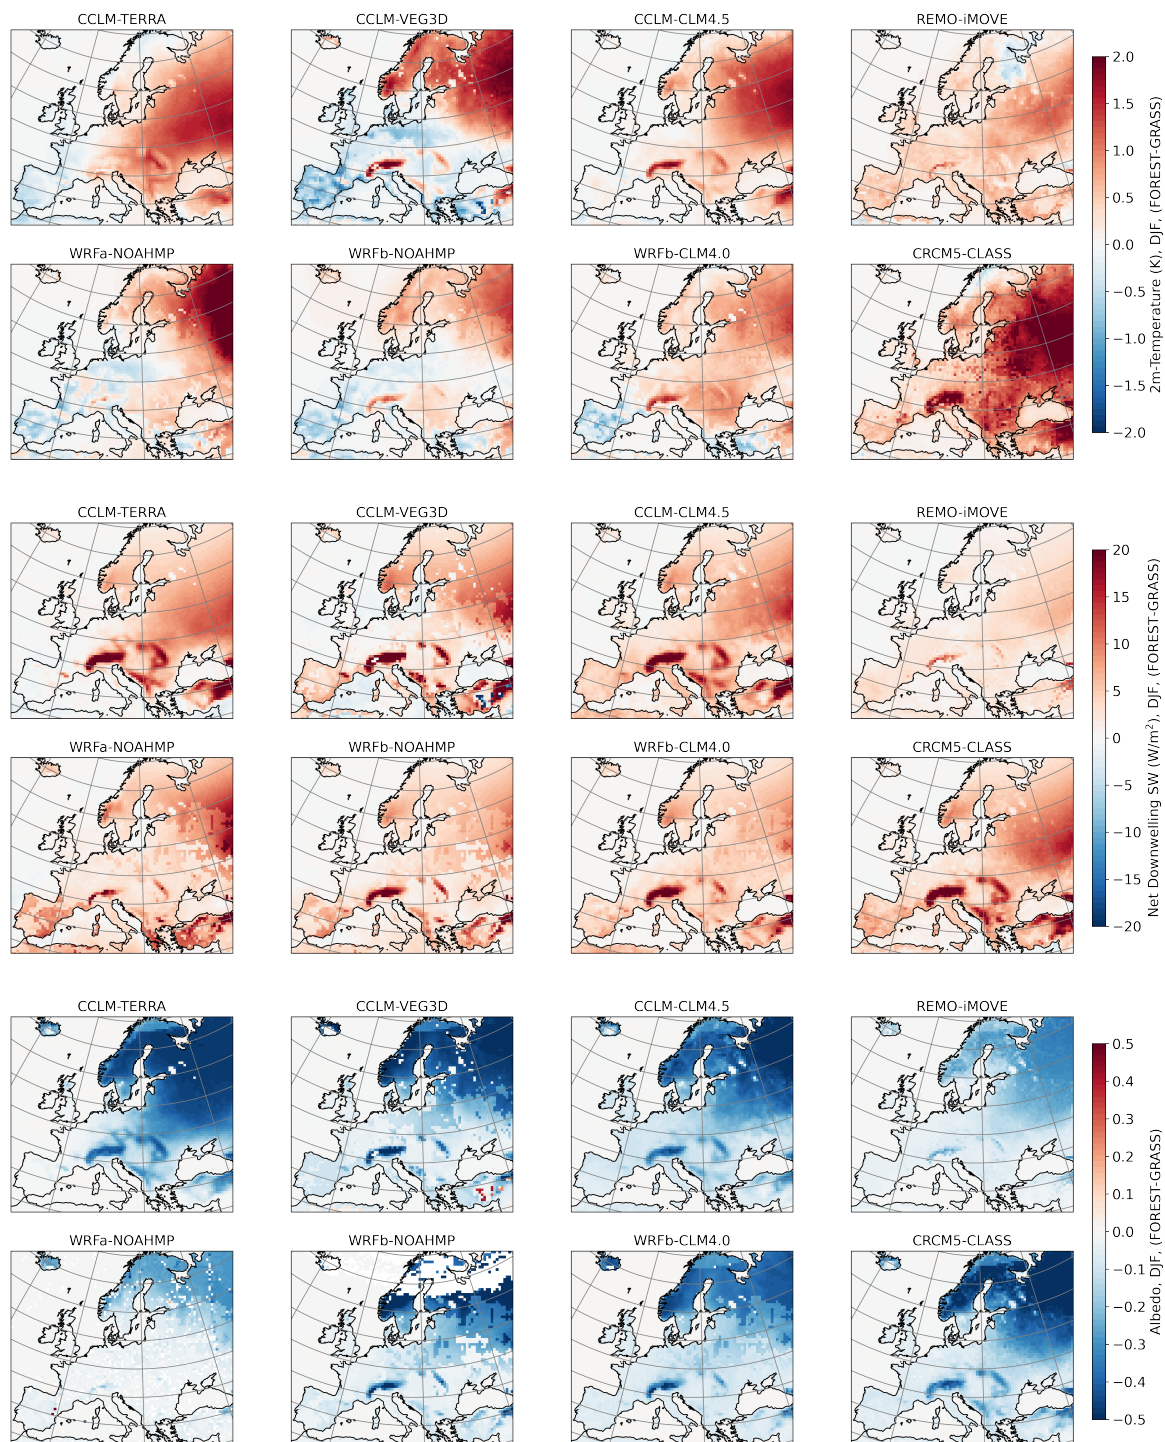

**Figure S1.** Comparison of the wintertime (DJF) temperature, shortwave and albedo responses of CRCM5 with some of the other LUCAS models of Davin et al. (2020).

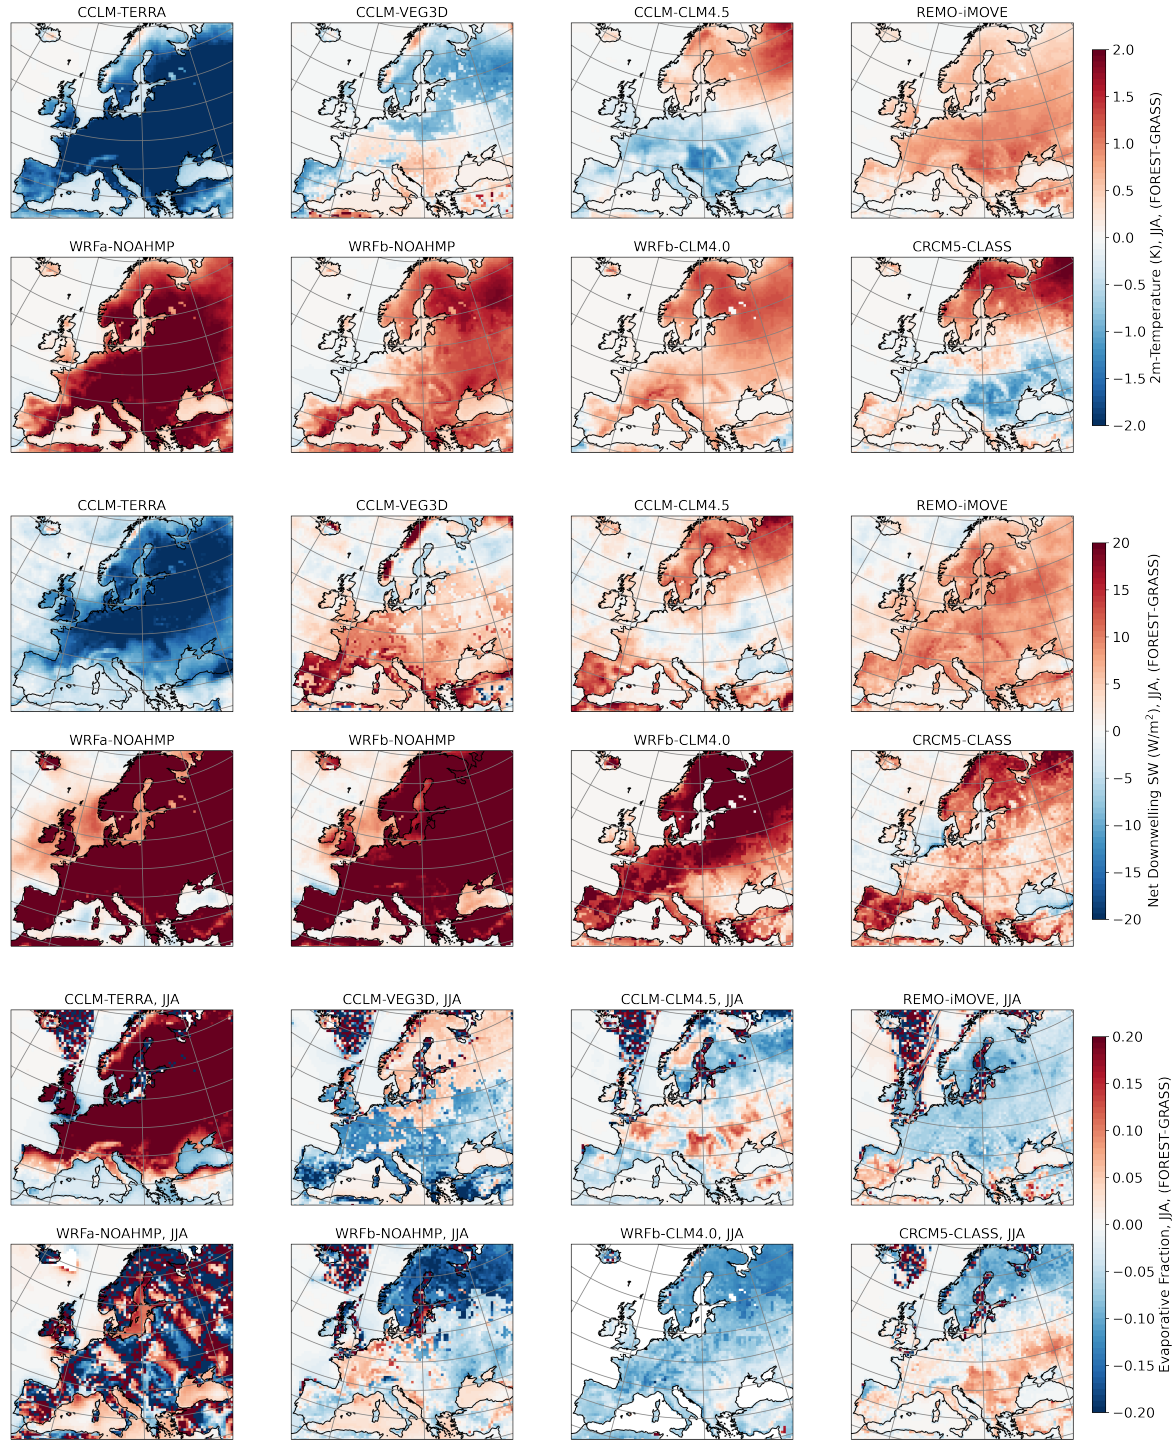

**Figure S2.** Comparison of the summertime (JJA) temperature, shortwave, and evaporative fraction responses of CRCM5 with some of the other LUCAS models of Davin et al. (2020).
